# Supplementary material for: Reduced Reliability of Procalcitonin (PCT) as a Biomarker of Bacterial Superinfection: Concerns about PCT-Driven Antibiotic Stewardship in Critically Ill COVID-19 Patients—Results from a Retrospective Observational Study in Intensive Care Units
Source: MDPI journal article supplement (doi:10.3390/jcm12196171), 2023-09-24
Supplement: s1 [file s1]

## Supplementary material

**Table S1:** the diagnostic accuracy of PCT and PCT-72h values in predicting an underlying a VAP/BSI considering different cut-off values.

| PCT     | Cut-off | Prevalenxce | Sensibility | Sens_low | Sens_high | Specificity | Spec_low | Spec_high | VPP      | VPP_low  | VPP_high | VPN      | VPN_low   | VPN_high  |
|---------|---------|-------------|-------------|----------|-----------|-------------|----------|-----------|----------|----------|----------|----------|-----------|-----------|
| PCT 72h | 0.10    | 0.364130    | 0.861866    | 0.755204 | 0.926572  | 0.120875    | 0.087235 | 0.165142  | 0.359552 | 0.333617 | 0.386335 | 0.604444 | .42710011 | .75799632 |
| PCT     | 0.10    | 0.364130    | 0.825281    | 0.694888 | 0.907376  | 0.162636    | 0.122995 | 0.211966  | 0.360772 | 0.330972 | 0.391683 | 0.619120 | 0.465547  | 0.752066  |
| PCT 72h | 0.20    | 0.364130    | 0.748324    | 0.617756 | 0.845450  | 0.326488    | 0.272819 | 0.385124  | 0.388849 | 0.349922 | 0.429248 | 0.693755 | .58062878 | .78753146 |
| PCT     | 0.20    | 0.364130    | 0.620808    | 0.465795 | 0.754542  | 0.414767    | 0.357877 | 0.474024  | 0.377900 | 0.326730 | 0.431943 | 0.656369 | 0.569786  | 0.733671  |
| PCT 72h | 0.30    | 0.364130    | 0.557703    | 0.417405 | 0.689359  | 0.555677    | 0.494528 | 0.615185  | 0.418191 | 0.357218 | 0.481770 | 0.686905 | .61427095 | .75139649 |
| PCT     | 0.30    | 0.364130    | 0.436442    | 0.295397 | 0.588576  | 0.642698    | 0.584764 | 0.696741  | 0.411587 | 0.335173 | 0.492517 | 0.665719 | 0.607668  | 0.719150  |
| PCT 72h | 0.40    | 0.364130    | 0.442601    | 0.310231 | 0.583660  | 0.687513    | 0.626895 | 0.742330  | 0.447847 | 0.369522 | 0.528848 | 0.682932 | .62556679 | .73522924 |
| PCT     | 0.40    | 0.364130    | 0.285829    | 0.171292 | 0.436602  | 0.753018    | 0.697977 | 0.800890  | 0.398575 | 0.296106 | 0.510773 | 0.648043 | 0.605754  | 0.688130  |
| PCT 72h | 0.50    | 0.364130    | 0.308416    | 0.197196 | 0.447405  | 0.770468    | 0.712547 | 0.819672  | 0.434853 | 0.333099 | 0.542411 | 0.660493 | .6165365  | .70184838 |
| PCT     | 0.50    | 0.364130    | 0.191842    | 0.101449 | 0.332934  | 0.815919    | 0.763553 | 0.858832  | 0.373745 | 0.248797 | 0.518159 | 0.638080 | 0.605263  | 0.669657  |
| PCT 72h | 0.60    | 0.364130    | 0.275107    | 0.168524 | 0.415421  | 0.807904    | 0.752319 | 0.853445  | 0.450583 | 0.339091 | 0.567269 | 0.660585 | .62014151 | .69881311 |
| PCT     | 0.60    | 0.364130    | 0.191842    | 0.101449 | 0.332934  | 0.847983    | 0.799135 | 0.886638  | 0.419506 | 0.285823 | 0.566149 | 0.646933 | 0.614519  | 0.678049  |
| PCT 72h | 0.70    | 0.364130    | 0.275107    | 0.168524 | 0.415421  | 0.824945    | 0.770648 | 0.868580  | 0.473669 | 0.359941 | 0.590197 | 0.665249 | .62508309 | .70315524 |
| PCT     | 0.70    | 0.364130    | 0.169319    | 0.085783 | 0.306894  | 0.862904    | 0.815594 | 0.899572  | 0.414262 | 0.272144 | 0.572246 | 0.644635 | 0.614549  | 0.673620  |
| PCT 72h | 0.80    | 0.364130    | 0.275107    | 0.168524 | 0.415421  | 0.835713    | 0.782627 | 0.877858  | 0.489518 | 0.374491 | 0.605665 | 0.668131 | .62813987 | .705835   |
| PCT     | 0.80    | 0.364130    | 0.169319    | 0.085783 | 0.306894  | 0.869837    | 0.823275 | 0.905539  | 0.426907 | 0.282410 | 0.585058 | 0.646466 | 0.616461  | 0.675360  |
| PCT 72h | 0.90    | 0.364130    | 0.263553    | 0.157282 | 0.406953  | 0.842562    | 0.790341 | 0.883690  | 0.489437 | 0.371156 | 0.608912 | 0.666432 | .62753625 | .70318705 |
| PCT     | 0.90    | 0.364130    | 0.154252    | 0.073714 | 0.294780  | 0.879083    | 0.834481 | 0.912920  | 0.422138 | 0.271266 | 0.589091 | 0.644772 | 0.616352  | 0.672207  |
| PCT 72h | 1.00    | 0.364130    | 0.263553    | 0.157282 | 0.406953  | 0.848306    | 0.797567 | 0.888111  | 0.498726 | 0.379745 | 0.617853 | 0.667941 | .62913473 | .70459244 |
| PCT     | 1.00    | 0.364130    | 0.154252    | 0.073714 | 0.294780  | 0.885746    | 0.843182 | 0.917883  | 0.436024 | 0.282458 | 0.602925 | 0.646500 | 0.618154  | 0.673852  |
| PCT 72h | 1.10    | 0.364130    | 0.241387    | 0.140376 | 0.382721  | 0.859907    | 0.810687 | 0.897941  | 0.496653 | 0.370986 | 0.622744 | 0.664366 | .62764582 | .69920108 |
| PCT     | 1.10    | 0.364130    | 0.131148    | 0.058766 | 0.267359  | 0.895431    | 0.854605 | 0.925788  | 0.417997 | 0.255063 | 0.601035 | 0.642817 | 0.616935  | 0.667893  |
| PCT 72h | 1.20    | 0.364130    | 0.219582    | 0.124092 | 0.358480  | 0.866362    | 0.818617 | 0.903029  | 0.484783 | 0.352693 | 0.619035 | 0.659700 | .6249904  | .69277532 |
| PCT     | 1.20    | 0.364130    | 0.131148    | 0.058766 | 0.267359  | 0.901893    | 0.862470 | 0.930920  | 0.433591 | 0.267191 | 0.616445 | 0.644467 | 0.618651  | 0.669469  |
| PCT 72h | 1.30    | 0.364130    | 0.198136    | 0.108434 | 0.334226  | 0.869323    | 0.821949 | 0.905542  | 0.464746 | 0.326757 | 0.608351 | 0.654360 | .62163144 | .68568807 |
| PCT     | 1.30    | 0.364130    | 0.131148    | 0.058766 | 0.267359  | 0.907002    | 0.868748 | 0.934941  | 0.446769 | 0.277629 | 0.629200 | 0.645760 | 0.619997  | 0.670704  |
| PCT 72h | 1.40    | 0.364130    | 0.198136    | 0.108434 | 0.334226  | 0.873622    | 0.827089 | 0.909010  | 0.473075 | 0.334049 | 0.616405 | 0.655474 | .62280105 | .68674085 |
| PCT     | 1.40    | 0.364130    | 0.131148    | 0.058766 | 0.267359  | 0.913552    | 0.877898 | 0.939513  | 0.464885 | 0.292267 | 0.646346 | 0.647404 | 0.621709  | 0.672274  |
| PCT 72h | 1.50    | 0.364130    | 0.198136    | 0.108434 | 0.334226  | 0.878845    | 0.833908 | 0.912893  | 0.483606 | 0.343360 | 0.626483 | 0.656819 | .62421247 | .68801055 |
| PCT     | 1.50    | 0.364130    | 0.131148    | 0.058766 | 0.267359  | 0.918730    | 0.884737 | 0.943340  | 0.480277 | 0.304976 | 0.660573 | 0.648693 | 0.623052  | 0.673505  |
| PCT 72h | 1.60    | 0.364130    | 0.198136    | 0.108434 | 0.334226  | 0.882479    | 0.837763 | 0.916104  | 0.491215 | 0.350151 | 0.633692 | 0.657749 | .62518838 | .68888799 |
| PCT     | 1.60    | 0.364130    | 0.131148    | 0.058766 | 0.267359  | 0.921721    | 0.888051 | 0.945881  | 0.489642 | 0.312835 | 0.669080 | 0.649434 | 0.623823  | 0.674212  |
| PCT 72h | 1.70    | 0.364130    | 0.198136    | 0.108434 | 0.334226  | 0.888330    | 0.845389 | 0.920467  | 0.503981 | 0.361668 | 0.645653 | 0.659235 | .62674895 | .69029033 |
| PCT     | 1.70    | 0.364130    | 0.131148    | 0.058766 | 0.267359  | 0.927605    | 0.895288 | 0.950500  | 0.509178 | 0.329543 | 0.686474 | 0.650881 | 0.625331  | 0.675593  |
| PCT 72h | 1.80    | 0.364130    | 0.180833    | 0.095418 | 0.316000  | 0.888576    | 0.845757 | 0.920623  | 0.481696 | 0.334135 | 0.632520 | 0.654485 | .62360468 | .68411565 |
| PCT     | 1.80    | 0.364130    | 0.131148    | 0.058766 | 0.267359  | 0.928232    | 0.896293 | 0.950874  | 0.511351 | 0.331428 | 0.688380 | 0.651035 | 0.625491  | 0.675740  |
| PCT 72h | 1.90    | 0.364130    | 0.163026    | 0.082436 | 0.296909  | 0.896619    | 0.854835 | 0.927398  | 0.474525 | 0.319194 | 0.634949 | 0.651655 | .62256945 | .67965178 |
| PCT     | 1.90    | 0.364130    | 0.131148    | 0.058766 | 0.267359  | 0.933428    | 0.902230 | 0.955165  | 0.530104 | 0.347929 | 0.704596 | 0.652302 | 0.626811  | 0.676949  |
| PCT 72h | 2.00    | 0.364130    | 0.150739    | 0.072038 | 0.288674  | 0.904415    | 0.865134 | 0.933139  | 0.474536 | 0.312485 | 0.642134 | 0.650310 | .62252053 | .67711534 |
| PCT     | 2.00    | 0.364130    | 0.131148    | 0.058766 | 0.267359  | 0.939028    | 0.909767 | 0.959225  | 0.551919 | 0.367656 | 0.722949 | 0.653657 | 0.628224  | 0.678242  |
| PCT 72h | 2.10    | 0.364130    | 0.128208    | 0.057460 | 0.261864  | 0.909643    | 0.871619 | 0.937216  | 0.448287 | 0.276892 | 0.632915 | 0.645652 | .62022578 | .6702816  |

|         |      |          |          |          |          |          |          |          |          |          |          |          |            |            |
|---------|------|----------|----------|----------|----------|----------|----------|----------|----------|----------|----------|----------|------------|------------|
| PCT     | 2.10 | 0.364130 | 0.108408 | 0.044777 | 0.239765 | 0.941375 | 0.913018 | 0.960883 | 0.514311 | 0.315354 | 0.708833 | 0.648355 | 0.625389   | 0.670654   |
| PCT 72h | 2.20 | 0.364130 | 0.128208 | 0.057460 | 0.261864 | 0.910975 | 0.873519 | 0.938124 | 0.451961 | 0.279826 | 0.636413 | 0.645987 | .62057401  | .67060128  |
| PCT     | 2.20 | 0.364130 | 0.108408 | 0.044777 | 0.239765 | 0.942946 | 0.915379 | 0.961906 | 0.521092 | 0.321114 | 0.714531 | 0.648735 | 0.625784   | 0.671017   |
| PCT 72h | 2.30 | 0.364130 | 0.128208 | 0.057460 | 0.261864 | 0.911185 | 0.873838 | 0.938258 | 0.452549 | 0.280296 | 0.636970 | 0.646040 | .62062906  | .67065183  |
| PCT     | 2.30 | 0.364130 | 0.108408 | 0.044777 | 0.239765 | 0.943591 | 0.916454 | 0.962276 | 0.523930 | 0.323541 | 0.716898 | 0.648890 | 0.625946   | 0.671167   |
| PCT 72h | 2.40 | 0.364130 | 0.128208 | 0.057460 | 0.261864 | 0.911934 | 0.874694 | 0.938879 | 0.454646 | 0.281979 | 0.638956 | 0.646228 | .62082449  | .67083121  |
| PCT     | 2.40 | 0.364130 | 0.108408 | 0.044777 | 0.239765 | 0.944218 | 0.917197 | 0.962779 | 0.526718 | 0.325937 | 0.719215 | 0.649042 | 0.626104   | 0.671312   |
| PCT 72h | 2.50 | 0.364130 | 0.128208 | 0.057460 | 0.261864 | 0.913197 | 0.876339 | 0.939823 | 0.458231 | 0.284865 | 0.642337 | 0.646544 | .62115382  | .67113349  |
| PCT     | 2.50 | 0.364130 | 0.108408 | 0.044777 | 0.239765 | 0.945149 | 0.918460 | 0.963450 | 0.530913 | 0.329559 | 0.722681 | 0.649266 | 0.626337   | 0.671527   |
| PCT 72h | 2.60 | 0.364130 | 0.128208 | 0.057460 | 0.261864 | 0.916231 | 0.879520 | 0.942488 | 0.467076 | 0.292044 | 0.650606 | 0.647302 | .62194255  | .67185731  |
| PCT     | 2.60 | 0.364130 | 0.108408 | 0.044777 | 0.239765 | 0.946922 | 0.920407 | 0.964941 | 0.539087 | 0.336683 | 0.729374 | 0.649693 | 0.626781   | 0.671935   |
| PCT 72h | 2.70 | 0.364130 | 0.128208 | 0.057460 | 0.261864 | 0.920189 | 0.883998 | 0.945781 | 0.479139 | 0.301971 | 0.661715 | 0.648285 | .6229663   | .67279655  |
| PCT     | 2.70 | 0.364130 | 0.086028 | 0.031874 | 0.212039 | 0.949259 | 0.922898 | 0.966930 | 0.492615 | 0.274211 | 0.713874 | 0.644595 | 0.624315   | 0.664368   |
| PCT 72h | 2.80 | 0.364130 | 0.128208 | 0.057460 | 0.261864 | 0.920782 | 0.884701 | 0.946257 | 0.481000 | 0.303516 | 0.663413 | 0.648432 | .62311922  | .67293681  |
| PCT     | 2.80 | 0.364130 | 0.086028 | 0.031874 | 0.212039 | 0.949947 | 0.923671 | 0.967496 | 0.496027 | 0.276874 | 0.716718 | 0.644761 | 0.624487   | 0.664528   |
| PCT 72h | 2.90 | 0.364130 | 0.128208 | 0.057460 | 0.261864 | 0.924175 | 0.887957 | 0.949353 | 0.491937 | 0.312676 | 0.673296 | 0.649270 | .62399194  | .67373721  |
| PCT     | 2.90 | 0.364130 | 0.086028 | 0.031874 | 0.212039 | 0.951028 | 0.924504 | 0.968551 | 0.501489 | 0.281168 | 0.721234 | 0.645021 | 0.624758   | 0.664778   |
| PCT 72h | 3.00 | 0.364130 | 0.128208 | 0.057460 | 0.261864 | 0.926297 | 0.891388 | 0.950608 | 0.499034 | 0.318691 | 0.679628 | 0.649792 | .6245358   | .67423589  |
| PCT     | 3.00 | 0.364130 | 0.086028 | 0.031874 | 0.212039 | 0.952140 | 0.925911 | 0.969391 | 0.507229 | 0.285721 | 0.725935 | 0.645289 | 0.625035   | 0.665035   |
| PCT 72h | 3.10 | 0.364130 | 0.106016 | 0.043805 | 0.234877 | 0.927607 | 0.893255 | 0.951504 | 0.456112 | 0.266152 | 0.659761 | 0.644374 | 0.62154614 | 0.66656433 |
| PCT     | 3.10 | 0.364130 | 0.086028 | 0.031874 | 0.212039 | 0.953380 | 0.927687 | 0.970237 | 0.513787 | 0.290975 | 0.731250 | 0.645587 | 0.625344   | 0.665321   |
| PCT 72h | 3.20 | 0.364130 | 0.106016 | 0.043805 | 0.234877 | 0.931231 | 0.897460 | 0.954445 | 0.468880 | 0.276115 | 0.671401 | 0.645267 | 0.62247386 | 0.66742021 |
| PCT     | 3.20 | 0.364130 | 0.086028 | 0.031874 | 0.212039 | 0.955457 | 0.930150 | 0.971872 | 0.525162 | 0.300225 | 0.740331 | 0.646084 | 0.625860   | 0.665799   |
| PCT 72h | 3.30 | 0.364130 | 0.106016 | 0.043805 | 0.234877 | 0.932244 | 0.898342 | 0.955402 | 0.472577 | 0.279035 | 0.674729 | 0.645516 | 0.62273237 | 0.66765867 |
| PCT     | 3.30 | 0.364130 | 0.086028 | 0.031874 | 0.212039 | 0.955951 | 0.930505 | 0.972356 | 0.527942 | 0.302513 | 0.742525 | 0.646202 | 0.625983   | 0.665912   |
| PCT 72h | 3.40 | 0.364130 | 0.106016 | 0.043805 | 0.234877 | 0.932947 | 0.899097 | 0.955997 | 0.475177 | 0.281097 | 0.677056 | 0.645689 | 0.62291148 | 0.66782387 |
| PCT     | 3.40 | 0.364130 | 0.086028 | 0.031874 | 0.212039 | 0.956635 | 0.931159 | 0.972957 | 0.531842 | 0.305740 | 0.745584 | 0.646366 | 0.626152   | 0.666070   |
| PCT 72h | 3.50 | 0.364130 | 0.106016 | 0.043805 | 0.234877 | 0.935791 | 0.902924 | 0.958047 | 0.485993 | 0.289761 | 0.686641 | 0.646385 | 0.62363449 | 0.66849068 |
| PCT     | 3.50 | 0.364130 | 0.086028 | 0.031874 | 0.212039 | 0.958860 | 0.933725 | 0.974721 | 0.544935 | 0.316727 | 0.755711 | 0.646897 | 0.626703   | 0.666580   |
| PCT 72h | 3.60 | 0.364130 | 0.106016 | 0.043805 | 0.234877 | 0.936166 | 0.903453 | 0.958307 | 0.487460 | 0.290946 | 0.687928 | 0.646476 | 0.62372984 | 0.6685786  |
| PCT     | 3.60 | 0.364130 | 0.086028 | 0.031874 | 0.212039 | 0.959259 | 0.934210 | 0.975026 | 0.547349 | 0.318780 | 0.757554 | 0.646992 | 0.626802   | 0.666671   |
| PCT 72h | 3.70 | 0.364130 | 0.106016 | 0.043805 | 0.234877 | 0.938261 | 0.905878 | 0.959995 | 0.495799 | 0.297735 | 0.695191 | 0.646987 | 0.62426044 | 0.66906787 |
| PCT     | 3.70 | 0.364130 | 0.086028 | 0.031874 | 0.212039 | 0.960806 | 0.936434 | 0.976072 | 0.556922 | 0.327002 | 0.764792 | 0.647360 | 0.627184   | 0.667024   |
| PCT 72h | 3.80 | 0.364130 | 0.106016 | 0.043805 | 0.234877 | 0.940783 | 0.908688 | 0.962068 | 0.506226 | 0.306340 | 0.704142 | 0.647600 | 0.62489731 | 0.66965503 |
| PCT     | 3.80 | 0.364130 | 0.086028 | 0.031874 | 0.212039 | 0.962277 | 0.938185 | 0.977208 | 0.566339 | 0.335223 | 0.771803 | 0.647709 | 0.627546   | 0.667359   |
| PCT 72h | 3.90 | 0.364130 | 0.106016 | 0.043805 | 0.234877 | 0.944305 | 0.912946 | 0.964803 | 0.521539 | 0.319221 | 0.717029 | 0.648452 | 0.6257828  | 0.67047125 |
| PCT     | 3.90 | 0.364130 | 0.086028 | 0.031874 | 0.212039 | 0.963803 | 0.939656 | 0.978508 | 0.576449 | 0.344197 | 0.779211 | 0.648070 | 0.627921   | 0.667706   |
| PCT 72h | 4.00 | 0.364130 | 0.106016 | 0.043805 | 0.234877 | 0.945390 | 0.914046 | 0.965732 | 0.526447 | 0.323412 | 0.721097 | 0.648714 | 0.62605489 | 0.67072201 |
| PCT     | 4.00 | 0.364130 | 0.064004 | 0.020265 | 0.184384 | 0.964723 | 0.940684 | 0.979235 | 0.509557 | 0.255279 | 0.758984 | 0.642840 | 0.625556   | 0.659759   |
| PCT 72h | 4.10 | 0.364130 | 0.106016 | 0.043805 | 0.234877 | 0.946650 | 0.915157 | 0.966876 | 0.532262 | 0.328418 | 0.725877 | 0.649017 | 0.62637027 | 0.67101265 |
| PCT     | 4.10 | 0.364130 | 0.064004 | 0.020265 | 0.184384 | 0.965373 | 0.941152 | 0.979839 | 0.514206 | 0.258733 | 0.762466 | 0.642995 | 0.625717   | 0.659908   |
| PCT 72h | 4.20 | 0.364130 | 0.084160 | 0.031197 | 0.207754 | 0.947855 | 0.917332 | 0.967508 | 0.480312 | 0.262525 | 0.705848 | 0.643787 | 0.6237253  | 0.66335727 |
| PCT     | 4.20 | 0.364130 | 0.064004 | 0.020265 | 0.184384 | 0.966621 | 0.943451 | 0.980493 | 0.523367 | 0.265627 | 0.769234 | 0.643291 | 0.626023   | 0.660194   |
| PCT 72h | 4.30 | 0.364130 | 0.084160 | 0.031197 | 0.207754 | 0.949698 | 0.919262 | 0.969047 | 0.489300 | 0.269394 | 0.713427 | 0.644233 | 0.62418713 | 0.66378523 |
| PCT     | 4.30 | 0.364130 | 0.064004 | 0.020265 | 0.184384 | 0.967550 | 0.944516 | 0.981212 | 0.530406 | 0.271007 | 0.774355 | 0.643511 | 0.626252   | 0.660406   |
| PCT 72h | 4.40 | 0.364130 | 0.084160 | 0.031197 | 0.207754 | 0.949698 | 0.919262 | 0.969047 | 0.489300 | 0.269394 | 0.713427 | 0.644233 | 0.62418713 | 0.66378523 |
| PCT     | 4.40 | 0.364130 | 0.064004 | 0.020265 | 0.184384 | 0.967550 | 0.944516 | 0.981212 | 0.530406 | 0.271007 | 0.774355 | 0.643511 | 0.626252   | 0.660406   |

|         |      |          |          |          |          |          |          |          |          |          |          |          |           |           |
|---------|------|----------|----------|----------|----------|----------|----------|----------|----------|----------|----------|----------|-----------|-----------|
| PCT 72h | 4.50 | 0.364130 | 0.084160 | 0.031197 | 0.207754 | 0.949698 | 0.919262 | 0.969047 | 0.489300 | 0.269394 | 0.713427 | 0.644233 | .62418713 | .66378523 |
| PCT     | 4.50 | 0.364130 | 0.064004 | 0.020265 | 0.184384 | 0.967976 | 0.945211 | 0.981468 | 0.533697 | 0.273547 | 0.776726 | 0.643612 | 0.626356  | 0.660503  |
| PCT 72h | 4.60 | 0.364130 | 0.084160 | 0.031197 | 0.207754 | 0.950362 | 0.920315 | 0.969456 | 0.492622 | 0.271959 | 0.716198 | 0.644393 | .62435329 | .66393919 |
| PCT     | 4.60 | 0.364130 | 0.064004 | 0.020265 | 0.184384 | 0.968364 | 0.945809 | 0.981713 | 0.536728 | 0.275900 | 0.778895 | 0.643704 | 0.626452  | 0.660592  |
| PCT 72h | 4.70 | 0.364130 | 0.084160 | 0.031197 | 0.207754 | 0.950906 | 0.920998 | 0.969862 | 0.495376 | 0.274095 | 0.718483 | 0.644524 | .62448922 | .66406513 |
| PCT     | 4.70 | 0.364130 | 0.064004 | 0.020265 | 0.184384 | 0.968960 | 0.946584 | 0.982140 | 0.541452 | 0.279596 | 0.782254 | 0.643845 | 0.626598  | 0.660728  |
| PCT 72h | 4.80 | 0.364130 | 0.084160 | 0.031197 | 0.207754 | 0.951227 | 0.921493 | 0.970066 | 0.497017 | 0.275373 | 0.719840 | 0.644601 | .62456944 | .66413947 |
| PCT     | 4.80 | 0.364130 | 0.064004 | 0.020265 | 0.184384 | 0.969308 | 0.947081 | 0.982373 | 0.544253 | 0.281803 | 0.784230 | 0.643928 | 0.626683  | 0.660807  |
| PCT 72h | 4.90 | 0.364130 | 0.084160 | 0.031197 | 0.207754 | 0.952542 | 0.922638 | 0.971247 | 0.503846 | 0.280727 | 0.725444 | 0.644918 | .62489741 | .66444333 |
| PCT     | 4.90 | 0.364130 | 0.064004 | 0.020265 | 0.184384 | 0.969748 | 0.947323 | 0.982800 | 0.547832 | 0.284641 | 0.786740 | 0.644032 | 0.626791  | 0.660907  |
| PCT 72h | 5.00 | 0.364130 | 0.084160 | 0.031197 | 0.207754 | 0.955620 | 0.925629 | 0.973858 | 0.520600 | 0.294122 | 0.738916 | 0.645656 | .6256633  | .66515286 |
| PCT     | 5.00 | 0.364130 | 0.064004 | 0.020265 | 0.184384 | 0.971510 | 0.948888 | 0.984286 | 0.562651 | 0.296602 | 0.796958 | 0.644448 | 0.627222  | 0.661308  |
| PCT 72h | 5.10 | 0.364130 | 0.084160 | 0.031197 | 0.207754 | 0.955620 | 0.925629 | 0.973858 | 0.520600 | 0.294122 | 0.738916 | 0.645656 | .6256633  | .66515286 |
| PCT     | 5.10 | 0.364130 | 0.064004 | 0.020265 | 0.184384 | 0.971510 | 0.948888 | 0.984286 | 0.562651 | 0.296602 | 0.796958 | 0.644448 | 0.627222  | 0.661308  |
| PCT 72h | 5.20 | 0.364130 | 0.084160 | 0.031197 | 0.207754 | 0.955620 | 0.925629 | 0.973858 | 0.520600 | 0.294122 | 0.738916 | 0.645656 | .6256633  | .66515286 |
| PCT     | 5.20 | 0.364130 | 0.064004 | 0.020265 | 0.184384 | 0.971510 | 0.948888 | 0.984286 | 0.562651 | 0.296602 | 0.796958 | 0.644448 | 0.627222  | 0.661308  |
| PCT 72h | 5.30 | 0.364130 | 0.084160 | 0.031197 | 0.207754 | 0.955620 | 0.925629 | 0.973858 | 0.520600 | 0.294122 | 0.738916 | 0.645656 | .6256633  | .66515286 |
| PCT     | 5.30 | 0.364130 | 0.064004 | 0.020265 | 0.184384 | 0.971510 | 0.948888 | 0.984286 | 0.562651 | 0.296602 | 0.796958 | 0.644448 | 0.627222  | 0.661308  |
| PCT 72h | 5.40 | 0.364130 | 0.084160 | 0.031197 | 0.207754 | 0.956139 | 0.926186 | 0.974275 | 0.523534 | 0.296506 | 0.741236 | 0.645780 | .62579209 | .66527216 |
| PCT     | 5.40 | 0.364130 | 0.064004 | 0.020265 | 0.184384 | 0.971677 | 0.948998 | 0.984437 | 0.564093 | 0.297785 | 0.797937 | 0.644487 | 0.627262  | 0.661346  |
| PCT 72h | 5.50 | 0.364130 | 0.084160 | 0.031197 | 0.207754 | 0.956139 | 0.926186 | 0.974275 | 0.523534 | 0.296506 | 0.741236 | 0.645780 | .62579209 | .66527216 |
| PCT     | 5.50 | 0.364130 | 0.064004 | 0.020265 | 0.184384 | 0.971677 | 0.948998 | 0.984437 | 0.564093 | 0.297785 | 0.797937 | 0.644487 | 0.627262  | 0.661346  |
| PCT 72h | 5.60 | 0.364130 | 0.084160 | 0.031197 | 0.207754 | 0.956423 | 0.926621 | 0.974454 | 0.525154 | 0.297827 | 0.742512 | 0.645848 | .62586252 | .66533374 |
| PCT     | 5.60 | 0.364130 | 0.064004 | 0.020265 | 0.184384 | 0.971955 | 0.949332 | 0.984640 | 0.566514 | 0.299777 | 0.799575 | 0.644553 | 0.627330  | 0.661409  |
| PCT 72h | 5.70 | 0.364130 | 0.084160 | 0.031197 | 0.207754 | 0.956423 | 0.926621 | 0.974454 | 0.525154 | 0.297827 | 0.742512 | 0.645848 | .62586252 | .66533374 |
| PCT     | 5.70 | 0.364130 | 0.064004 | 0.020265 | 0.184384 | 0.971955 | 0.949332 | 0.984640 | 0.566514 | 0.299777 | 0.799575 | 0.644553 | 0.627330  | 0.661409  |
| PCT 72h | 5.80 | 0.364130 | 0.084160 | 0.031197 | 0.207754 | 0.956423 | 0.926621 | 0.974454 | 0.525154 | 0.297827 | 0.742512 | 0.645848 | .62586252 | .66533374 |
| PCT     | 5.80 | 0.364130 | 0.064004 | 0.020265 | 0.184384 | 0.971955 | 0.949332 | 0.984640 | 0.566514 | 0.299777 | 0.799575 | 0.644553 | 0.627330  | 0.661409  |
| PCT 72h | 5.90 | 0.364130 | 0.084160 | 0.031197 | 0.207754 | 0.956423 | 0.926621 | 0.974454 | 0.525154 | 0.297827 | 0.742512 | 0.645848 | .62586252 | .66533374 |
| PCT     | 5.90 | 0.364130 | 0.064004 | 0.020265 | 0.184384 | 0.971955 | 0.949332 | 0.984640 | 0.566514 | 0.299777 | 0.799575 | 0.644553 | 0.627330  | 0.661409  |
| PCT 72h | 6.00 | 0.364130 | 0.084160 | 0.031197 | 0.207754 | 0.956423 | 0.926621 | 0.974454 | 0.525154 | 0.297827 | 0.742512 | 0.645848 | .62586252 | .66533374 |
| PCT     | 6.00 | 0.364130 | 0.064004 | 0.020265 | 0.184384 | 0.971955 | 0.949332 | 0.984640 | 0.566514 | 0.299777 | 0.799575 | 0.644553 | 0.627330  | 0.661409  |
| PCT 72h | 6.10 | 0.364130 | 0.084160 | 0.031197 | 0.207754 | 0.957835 | 0.928375 | 0.975498 | 0.533365 | 0.304581 | 0.748926 | 0.646186 | .62621262 | .66566168 |
| PCT     | 6.10 | 0.364130 | 0.064004 | 0.020265 | 0.184384 | 0.972338 | 0.949551 | 0.984995 | 0.569890 | 0.302573 | 0.801847 | 0.644643 | 0.627424  | 0.661496  |
| PCT 72h | 6.20 | 0.364130 | 0.084160 | 0.031197 | 0.207754 | 0.957835 | 0.928375 | 0.975498 | 0.533365 | 0.304581 | 0.748926 | 0.646186 | .62621262 | .66566168 |
| PCT     | 6.20 | 0.364130 | 0.064004 | 0.020265 | 0.184384 | 0.973497 | 0.952131 | 0.985472 | 0.580351 | 0.311354 | 0.808799 | 0.644916 | 0.627706  | 0.661759  |
| PCT 72h | 6.30 | 0.364130 | 0.084160 | 0.031197 | 0.207754 | 0.957835 | 0.928375 | 0.975498 | 0.533365 | 0.304581 | 0.748926 | 0.646186 | .62621262 | .66566168 |
| PCT     | 6.30 | 0.364130 | 0.064004 | 0.020265 | 0.184384 | 0.973497 | 0.952131 | 0.985472 | 0.580351 | 0.311354 | 0.808799 | 0.644916 | 0.627706  | 0.661759  |
| PCT 72h | 6.40 | 0.364130 | 0.084160 | 0.031197 | 0.207754 | 0.958083 | 0.928677 | 0.975683 | 0.534830 | 0.305796 | 0.750061 | 0.646245 | .62627388 | .66571842 |
| PCT     | 6.40 | 0.364130 | 0.064004 | 0.020265 | 0.184384 | 0.973789 | 0.952493 | 0.985682 | 0.583045 | 0.313645 | 0.810568 | 0.644985 | 0.627777  | 0.661825  |
| PCT 72h | 6.50 | 0.364130 | 0.084160 | 0.031197 | 0.207754 | 0.958083 | 0.928677 | 0.975683 | 0.534830 | 0.305796 | 0.750061 | 0.646245 | .62627388 | .66571842 |
| PCT     | 6.50 | 0.364130 | 0.064004 | 0.020265 | 0.184384 | 0.973789 | 0.952493 | 0.985682 | 0.583045 | 0.313645 | 0.810568 | 0.644985 | 0.627777  | 0.661825  |
| PCT 72h | 6.60 | 0.364130 | 0.084160 | 0.031197 | 0.207754 | 0.958083 | 0.928677 | 0.975683 | 0.534830 | 0.305796 | 0.750061 | 0.646245 | .62627388 | .66571842 |
| PCT     | 6.60 | 0.364130 | 0.064004 | 0.020265 | 0.184384 | 0.973789 | 0.952493 | 0.985682 | 0.583045 | 0.313645 | 0.810568 | 0.644985 | 0.627777  | 0.661825  |
| PCT 72h | 6.70 | 0.364130 | 0.084160 | 0.031197 | 0.207754 | 0.958083 | 0.928677 | 0.975683 | 0.534830 | 0.305796 | 0.750061 | 0.646245 | .62627388 | .66571842 |
| PCT     | 6.70 | 0.364130 | 0.064004 | 0.020265 | 0.184384 | 0.974905 | 0.955279 | 0.986044 | 0.593585 | 0.322730 | 0.817405 | 0.645247 | 0.628049  | 0.662077  |
| PCT 72h | 6.80 | 0.364130 | 0.084160 | 0.031197 | 0.207754 | 0.958083 | 0.928677 | 0.975683 | 0.534830 | 0.305796 | 0.750061 | 0.646245 | .62627388 | .66571842 |

|         |      |          |          |          |          |          |          |          |          |          |          |          |           |           |
|---------|------|----------|----------|----------|----------|----------|----------|----------|----------|----------|----------|----------|-----------|-----------|
| PCT     | 6.80 | 0.364130 | 0.064004 | 0.020265 | 0.184384 | 0.974905 | 0.955279 | 0.986044 | 0.593585 | 0.322730 | 0.817405 | 0.645247 | 0.628049  | 0.662077  |
| PCT 72h | 6.90 | 0.364130 | 0.084160 | 0.031197 | 0.207754 | 0.958416 | 0.929241 | 0.975874 | 0.536816 | 0.307448 | 0.751595 | 0.646324 | .62635639 | .66579484 |
| PCT     | 6.90 | 0.364130 | 0.064004 | 0.020265 | 0.184384 | 0.975509 | 0.956370 | 0.986372 | 0.599445 | 0.327866 | 0.821151 | 0.645388 | 0.628196  | 0.662214  |
| PCT 72h | 7.00 | 0.364130 | 0.084160 | 0.031197 | 0.207754 | 0.958416 | 0.929241 | 0.975874 | 0.536816 | 0.307448 | 0.751595 | 0.646324 | .62635639 | .66579484 |
| PCT     | 7.00 | 0.364130 | 0.064004 | 0.020265 | 0.184384 | 0.975509 | 0.956370 | 0.986372 | 0.599445 | 0.327866 | 0.821151 | 0.645388 | 0.628196  | 0.662214  |
| PCT 72h | 7.10 | 0.364130 | 0.084160 | 0.031197 | 0.207754 | 0.958416 | 0.929241 | 0.975874 | 0.536816 | 0.307448 | 0.751595 | 0.646324 | .62635639 | .66579484 |
| PCT     | 7.10 | 0.364130 | 0.064004 | 0.020265 | 0.184384 | 0.975509 | 0.956370 | 0.986372 | 0.599445 | 0.327866 | 0.821151 | 0.645388 | 0.628196  | 0.662214  |
| PCT 72h | 7.20 | 0.364130 | 0.084160 | 0.031197 | 0.207754 | 0.958416 | 0.929241 | 0.975874 | 0.536816 | 0.307448 | 0.751595 | 0.646324 | .62635639 | .66579484 |
| PCT     | 7.20 | 0.364130 | 0.064004 | 0.020265 | 0.184384 | 0.975509 | 0.956370 | 0.986372 | 0.599445 | 0.327866 | 0.821151 | 0.645388 | 0.628196  | 0.662214  |
| PCT 72h | 7.30 | 0.364130 | 0.084160 | 0.031197 | 0.207754 | 0.958416 | 0.929241 | 0.975874 | 0.536816 | 0.307448 | 0.751595 | 0.646324 | .62635639 | .66579484 |
| PCT     | 7.30 | 0.364130 | 0.064004 | 0.020265 | 0.184384 | 0.975509 | 0.956370 | 0.986372 | 0.599445 | 0.327866 | 0.821151 | 0.645388 | 0.628196  | 0.662214  |
| PCT 72h | 7.40 | 0.364130 | 0.084160 | 0.031197 | 0.207754 | 0.958416 | 0.929241 | 0.975874 | 0.536816 | 0.307448 | 0.751595 | 0.646324 | .62635639 | .66579484 |
| PCT     | 7.40 | 0.364130 | 0.042330 | 0.010325 | 0.157724 | 0.975509 | 0.956370 | 0.986372 | 0.497423 | 0.199791 | 0.796893 | 0.640132 | 0.626213  | 0.653819  |
| PCT 72h | 7.50 | 0.364130 | 0.084160 | 0.031197 | 0.207754 | 0.959386 | 0.931322 | 0.976275 | 0.542678 | 0.312356 | 0.756094 | 0.646556 | .62659615 | .6660169  |
| PCT     | 7.50 | 0.364130 | 0.042330 | 0.010325 | 0.157724 | 0.976556 | 0.958708 | 0.986796 | 0.508349 | 0.206636 | 0.804101 | 0.640379 | 0.626469  | 0.654057  |
| PCT 72h | 7.60 | 0.364130 | 0.084160 | 0.031197 | 0.207754 | 0.959386 | 0.931322 | 0.976275 | 0.542678 | 0.312356 | 0.756094 | 0.646556 | .62659615 | .6660169  |
| PCT     | 7.60 | 0.364130 | 0.042330 | 0.010325 | 0.157724 | 0.976556 | 0.958708 | 0.986796 | 0.508349 | 0.206636 | 0.804101 | 0.640379 | 0.626469  | 0.654057  |
| PCT 72h | 7.70 | 0.364130 | 0.084160 | 0.031197 | 0.207754 | 0.959386 | 0.931322 | 0.976275 | 0.542678 | 0.312356 | 0.756094 | 0.646556 | .62659615 | .6660169  |
| PCT     | 7.70 | 0.364130 | 0.042330 | 0.010325 | 0.157724 | 0.976556 | 0.958708 | 0.986796 | 0.508349 | 0.206636 | 0.804101 | 0.640379 | 0.626469  | 0.654057  |
| PCT 72h | 7.80 | 0.364130 | 0.084160 | 0.031197 | 0.207754 | 0.960431 | 0.933489 | 0.976731 | 0.549139 | 0.317822 | 0.761002 | 0.646804 | .62685411 | .6662558  |
| PCT     | 7.80 | 0.364130 | 0.042330 | 0.010325 | 0.157724 | 0.977604 | 0.960788 | 0.987304 | 0.519776 | 0.213972 | 0.811447 | 0.640626 | 0.626724  | 0.654296  |
| PCT 72h | 7.90 | 0.364130 | 0.084160 | 0.031197 | 0.207754 | 0.960431 | 0.933489 | 0.976731 | 0.549139 | 0.317822 | 0.761002 | 0.646804 | .62685411 | .6662558  |
| PCT     | 7.90 | 0.364130 | 0.042330 | 0.010325 | 0.157724 | 0.978062 | 0.961390 | 0.987628 | 0.524926 | 0.217340 | 0.814695 | 0.640734 | 0.626836  | 0.654400  |
| PCT 72h | 8.00 | 0.364130 | 0.084160 | 0.031197 | 0.207754 | 0.960431 | 0.933489 | 0.976731 | 0.549139 | 0.317822 | 0.761002 | 0.646804 | .62685411 | .6662558  |
| PCT     | 8.00 | 0.364130 | 0.042330 | 0.010325 | 0.157724 | 0.978062 | 0.961390 | 0.987628 | 0.524926 | 0.217340 | 0.814695 | 0.640734 | 0.626836  | 0.654400  |
| PCT 72h | 8.10 | 0.364130 | 0.084160 | 0.031197 | 0.207754 | 0.960431 | 0.933489 | 0.976731 | 0.549139 | 0.317822 | 0.761002 | 0.646804 | .62685411 | .6662558  |
| PCT     | 8.10 | 0.364130 | 0.042330 | 0.010325 | 0.157724 | 0.978062 | 0.961390 | 0.987628 | 0.524926 | 0.217340 | 0.814695 | 0.640734 | 0.626836  | 0.654400  |
| PCT 72h | 8.20 | 0.364130 | 0.084160 | 0.031197 | 0.207754 | 0.960431 | 0.933489 | 0.976731 | 0.549139 | 0.317822 | 0.761002 | 0.646804 | .62685411 | .6662558  |
| PCT     | 8.20 | 0.364130 | 0.042330 | 0.010325 | 0.157724 | 0.978062 | 0.961390 | 0.987628 | 0.524926 | 0.217340 | 0.814695 | 0.640734 | 0.626836  | 0.654400  |
| PCT 72h | 8.30 | 0.364130 | 0.084160 | 0.031197 | 0.207754 | 0.961246 | 0.934313 | 0.977403 | 0.554288 | 0.322223 | 0.764875 | 0.646998 | .62705516 | .66644199 |
| PCT     | 8.30 | 0.364130 | 0.042330 | 0.010325 | 0.157724 | 0.978604 | 0.961824 | 0.988099 | 0.531157 | 0.221467 | 0.818574 | 0.640861 | 0.626968  | 0.654522  |
| PCT 72h | 8.40 | 0.364130 | 0.084160 | 0.031197 | 0.207754 | 0.961246 | 0.934313 | 0.977403 | 0.554288 | 0.322223 | 0.764875 | 0.646998 | .62705516 | .66644199 |
| PCT     | 8.40 | 0.364130 | 0.042330 | 0.010325 | 0.157724 | 0.978604 | 0.961824 | 0.988099 | 0.531157 | 0.221467 | 0.818574 | 0.640861 | 0.626968  | 0.654522  |
| PCT 72h | 8.50 | 0.364130 | 0.084160 | 0.031197 | 0.207754 | 0.963400 | 0.936605 | 0.979122 | 0.568367 | 0.334455 | 0.775300 | 0.647509 | .62758524 | .66693285 |
| PCT     | 8.50 | 0.364130 | 0.042330 | 0.010325 | 0.157724 | 0.979614 | 0.962783 | 0.988921 | 0.543178 | 0.229595 | 0.825906 | 0.641099 | 0.627214  | 0.654751  |
| PCT 72h | 8.60 | 0.364130 | 0.084160 | 0.031197 | 0.207754 | 0.963400 | 0.936605 | 0.979122 | 0.568367 | 0.334455 | 0.775300 | 0.647509 | .62758524 | .66693285 |
| PCT     | 8.60 | 0.364130 | 0.042330 | 0.010325 | 0.157724 | 0.979614 | 0.962783 | 0.988921 | 0.543178 | 0.229595 | 0.825906 | 0.641099 | 0.627214  | 0.654751  |
| PCT 72h | 8.70 | 0.364130 | 0.084160 | 0.031197 | 0.207754 | 0.964336 | 0.938503 | 0.979554 | 0.574711 | 0.340066 | 0.779920 | 0.647731 | .62781514 | .66714573 |
| PCT     | 8.70 | 0.364130 | 0.042330 | 0.010325 | 0.157724 | 0.980581 | 0.964703 | 0.989394 | 0.555207 | 0.237956 | 0.833048 | 0.641326 | 0.627448  | 0.654970  |
| PCT 72h | 8.80 | 0.364130 | 0.084160 | 0.031197 | 0.207754 | 0.964336 | 0.938503 | 0.979554 | 0.574711 | 0.340066 | 0.779920 | 0.647731 | .62781514 | .66714573 |
| PCT     | 8.80 | 0.364130 | 0.042330 | 0.010325 | 0.157724 | 0.980581 | 0.964703 | 0.989394 | 0.555207 | 0.237956 | 0.833048 | 0.641326 | 0.627448  | 0.654970  |
| PCT 72h | 8.90 | 0.364130 | 0.084160 | 0.031197 | 0.207754 | 0.964336 | 0.938503 | 0.979554 | 0.574711 | 0.340066 | 0.779920 | 0.647731 | .62781514 | .66714573 |
| PCT     | 8.90 | 0.364130 | 0.042330 | 0.010325 | 0.157724 | 0.980581 | 0.964703 | 0.989394 | 0.555207 | 0.237956 | 0.833048 | 0.641326 | 0.627448  | 0.654970  |
| PCT 72h | 9.00 | 0.364130 | 0.084160 | 0.031197 | 0.207754 | 0.964840 | 0.938737 | 0.980057 | 0.578185 | 0.343164 | 0.782429 | 0.647850 | .62793876 | .66726019 |
| PCT     | 9.00 | 0.364130 | 0.042330 | 0.010325 | 0.157724 | 0.980729 | 0.964669 | 0.989567 | 0.557097 | 0.239291 | 0.834153 | 0.641360 | 0.627484  | 0.655004  |
| PCT 72h | 9.10 | 0.364130 | 0.084160 | 0.031197 | 0.207754 | 0.964840 | 0.938737 | 0.980057 | 0.578185 | 0.343164 | 0.782429 | 0.647850 | .62793876 | .66726019 |
| PCT     | 9.10 | 0.364130 | 0.042330 | 0.010325 | 0.157724 | 0.980729 | 0.964669 | 0.989567 | 0.557097 | 0.239291 | 0.834153 | 0.641360 | 0.627484  | 0.655004  |

|         |       |          |          |          |          |          |          |          |          |          |          |          |           |           |
|---------|-------|----------|----------|----------|----------|----------|----------|----------|----------|----------|----------|----------|-----------|-----------|
| PCT 72h | 9.20  | 0.364130 | 0.084160 | 0.031197 | 0.207754 | 0.964840 | 0.938737 | 0.980057 | 0.578185 | 0.343164 | 0.782429 | 0.647850 | .62793876 | .66726019 |
| PCT     | 9.20  | 0.364130 | 0.042330 | 0.010325 | 0.157724 | 0.980729 | 0.964669 | 0.989567 | 0.557097 | 0.239291 | 0.834153 | 0.641360 | 0.627484  | 0.655004  |
| PCT 72h | 9.30  | 0.364130 | 0.084160 | 0.031197 | 0.207754 | 0.964840 | 0.938737 | 0.980057 | 0.578185 | 0.343164 | 0.782429 | 0.647850 | .62793876 | .66726019 |
| PCT     | 9.30  | 0.364130 | 0.042330 | 0.010325 | 0.157724 | 0.980729 | 0.964669 | 0.989567 | 0.557097 | 0.239291 | 0.834153 | 0.641360 | 0.627484  | 0.655004  |
| PCT 72h | 9.40  | 0.364130 | 0.084160 | 0.031197 | 0.207754 | 0.965361 | 0.939219 | 0.980493 | 0.581820 | 0.346427 | 0.785040 | 0.647973 | .62806648 | .66737844 |
| PCT     | 9.40  | 0.364130 | 0.042330 | 0.010325 | 0.157724 | 0.981258 | 0.965021 | 0.990036 | 0.563962 | 0.244189 | 0.838128 | 0.641485 | 0.627613  | 0.655123  |
| PCT 72h | 9.50  | 0.364130 | 0.084160 | 0.031197 | 0.207754 | 0.965361 | 0.939219 | 0.980493 | 0.581820 | 0.346427 | 0.785040 | 0.647973 | .62806648 | .66737844 |
| PCT     | 9.50  | 0.364130 | 0.042330 | 0.010325 | 0.157724 | 0.981258 | 0.965021 | 0.990036 | 0.563962 | 0.244189 | 0.838128 | 0.641485 | 0.627613  | 0.655123  |
| PCT 72h | 9.60  | 0.364130 | 0.084160 | 0.031197 | 0.207754 | 0.965361 | 0.939219 | 0.980493 | 0.581820 | 0.346427 | 0.785040 | 0.647973 | .62806648 | .66737844 |
| PCT     | 9.60  | 0.364130 | 0.042330 | 0.010325 | 0.157724 | 0.981258 | 0.965021 | 0.990036 | 0.563962 | 0.244189 | 0.838128 | 0.641485 | 0.627613  | 0.655123  |
| PCT 72h | 9.70  | 0.364130 | 0.084160 | 0.031197 | 0.207754 | 0.965361 | 0.939219 | 0.980493 | 0.581820 | 0.346427 | 0.785040 | 0.647973 | .62806648 | .66737844 |
| PCT     | 9.70  | 0.364130 | 0.042330 | 0.010325 | 0.157724 | 0.981258 | 0.965021 | 0.990036 | 0.563962 | 0.244189 | 0.838128 | 0.641485 | 0.627613  | 0.655123  |
| PCT 72h | 9.80  | 0.364130 | 0.084160 | 0.031197 | 0.207754 | 0.965361 | 0.939219 | 0.980493 | 0.581820 | 0.346427 | 0.785040 | 0.647973 | .62806648 | .66737844 |
| PCT     | 9.80  | 0.364130 | 0.042330 | 0.010325 | 0.157724 | 0.981258 | 0.965021 | 0.990036 | 0.563962 | 0.244189 | 0.838128 | 0.641485 | 0.627613  | 0.655123  |
| PCT 72h | 9.90  | 0.364130 | 0.084160 | 0.031197 | 0.207754 | 0.965361 | 0.939219 | 0.980493 | 0.581820 | 0.346427 | 0.785040 | 0.647973 | .62806648 | .66737844 |
| PCT     | 9.90  | 0.364130 | 0.042330 | 0.010325 | 0.157724 | 0.981258 | 0.965021 | 0.990036 | 0.563962 | 0.244189 | 0.838128 | 0.641485 | 0.627613  | 0.655123  |
| PCT 72h | 10.00 | 0.364130 | 0.062636 | 0.019844 | 0.180694 | 0.968024 | 0.943190 | 0.982207 | 0.528689 | 0.267161 | 0.775362 | 0.643289 | .62622361 | .65999762 |
| PCT     | 10.00 | 0.364130 | 0.042330 | 0.010325 | 0.157724 | 0.982571 | 0.966725 | 0.990942 | 0.581732 | 0.257242 | 0.848145 | 0.641792 | 0.627931  | 0.655420  |
| PCT 72h | 10.10 | 0.364130 | 0.062636 | 0.019844 | 0.180694 | 0.971555 | 0.947969 | 0.984623 | 0.557716 | 0.289915 | 0.795693 | 0.644124 | .62708837 | .66080181 |
| PCT     | 10.10 | 0.364130 | 0.042330 | 0.010325 | 0.157724 | 0.984343 | 0.968835 | 0.992196 | 0.607558 | 0.277234 | 0.862041 | 0.642206 | 0.628360  | 0.655819  |
| PCT 72h | 10.20 | 0.364130 | 0.062636 | 0.019844 | 0.180694 | 0.974648 | 0.952039 | 0.986747 | 0.585887 | 0.313284 | 0.814390 | 0.644852 | .62784245 | .66150298 |
| PCT     | 10.20 | 0.364130 | 0.042330 | 0.010325 | 0.157724 | 0.985749 | 0.970337 | 0.993210 | 0.629763 | 0.295469 | 0.873401 | 0.642534 | 0.628699  | 0.656135  |
| PCT 72h | 10.30 | 0.364130 | 0.062636 | 0.019844 | 0.180694 | 0.974648 | 0.952039 | 0.986747 | 0.585887 | 0.313284 | 0.814390 | 0.644852 | .62784245 | .66150298 |
| PCT     | 10.30 | 0.364130 | 0.042330 | 0.010325 | 0.157724 | 0.985749 | 0.970337 | 0.993210 | 0.629763 | 0.295469 | 0.873401 | 0.642534 | 0.628699  | 0.656135  |
| PCT 72h | 10.40 | 0.364130 | 0.062636 | 0.019844 | 0.180694 | 0.974858 | 0.952266 | 0.986904 | 0.587905 | 0.315009 | 0.815692 | 0.644901 | .62789357 | .66155051 |
| PCT     | 10.40 | 0.364130 | 0.042330 | 0.010325 | 0.157724 | 0.985998 | 0.970590 | 0.993389 | 0.633859 | 0.298946 | 0.875440 | 0.642592 | 0.628759  | 0.656191  |
| PCT 72h | 10.50 | 0.364130 | 0.062636 | 0.019844 | 0.180694 | 0.974858 | 0.952266 | 0.986904 | 0.587905 | 0.315009 | 0.815692 | 0.644901 | .62789357 | .66155051 |
| PCT     | 10.50 | 0.364130 | 0.042330 | 0.010325 | 0.157724 | 0.985998 | 0.970590 | 0.993389 | 0.633859 | 0.298946 | 0.875440 | 0.642592 | 0.628759  | 0.656191  |
| PCT 72h | 10.60 | 0.364130 | 0.062636 | 0.019844 | 0.180694 | 0.974858 | 0.952266 | 0.986904 | 0.587905 | 0.315009 | 0.815692 | 0.644901 | .62789357 | .66155051 |
| PCT     | 10.60 | 0.364130 | 0.042330 | 0.010325 | 0.157724 | 0.985998 | 0.970590 | 0.993389 | 0.633859 | 0.298946 | 0.875440 | 0.642592 | 0.628759  | 0.656191  |
| PCT 72h | 10.70 | 0.364130 | 0.042330 | 0.010325 | 0.157724 | 0.974858 | 0.952266 | 0.986904 | 0.490867 | 0.195761 | 0.792477 | 0.639978 | .62605387 | .65367082 |
| PCT     | 10.70 | 0.364130 | 0.042330 | 0.010325 | 0.157724 | 0.985998 | 0.970590 | 0.993389 | 0.633859 | 0.298946 | 0.875440 | 0.642592 | 0.628759  | 0.656191  |
| PCT 72h | 10.80 | 0.364130 | 0.042330 | 0.010325 | 0.157724 | 0.974858 | 0.952266 | 0.986904 | 0.490867 | 0.195761 | 0.792477 | 0.639978 | .62605387 | .65367082 |
| PCT     | 10.80 | 0.364130 | 0.042330 | 0.010325 | 0.157724 | 0.985998 | 0.970590 | 0.993389 | 0.633859 | 0.298946 | 0.875440 | 0.642592 | 0.628759  | 0.656191  |
| PCT 72h | 10.90 | 0.364130 | 0.042330 | 0.010325 | 0.157724 | 0.974858 | 0.952266 | 0.986904 | 0.490867 | 0.195761 | 0.792477 | 0.639978 | .62605387 | .65367082 |
| PCT     | 10.90 | 0.364130 | 0.042330 | 0.010325 | 0.157724 | 0.985998 | 0.970590 | 0.993389 | 0.633859 | 0.298946 | 0.875440 | 0.642592 | 0.628759  | 0.656191  |
| PCT 72h | 11.00 | 0.364130 | 0.042330 | 0.010325 | 0.157724 | 0.974858 | 0.952266 | 0.986904 | 0.490867 | 0.195761 | 0.792477 | 0.639978 | .62605387 | .65367082 |
| PCT     | 11.00 | 0.364130 | 0.042330 | 0.010325 | 0.157724 | 0.985998 | 0.970590 | 0.993389 | 0.633859 | 0.298946 | 0.875440 | 0.642592 | 0.628759  | 0.656191  |
| PCT 72h | 11.10 | 0.364130 | 0.042330 | 0.010325 | 0.157724 | 0.974858 | 0.952266 | 0.986904 | 0.490867 | 0.195761 | 0.792477 | 0.639978 | .62605387 | .65367082 |
| PCT     | 11.10 | 0.364130 | 0.042330 | 0.010325 | 0.157724 | 0.985998 | 0.970590 | 0.993389 | 0.633859 | 0.298946 | 0.875440 | 0.642592 | 0.628759  | 0.656191  |
| PCT 72h | 11.20 | 0.364130 | 0.042330 | 0.010325 | 0.157724 | 0.974858 | 0.952266 | 0.986904 | 0.490867 | 0.195761 | 0.792477 | 0.639978 | .62605387 | .65367082 |
| PCT     | 11.20 | 0.364130 | 0.042330 | 0.010325 | 0.157724 | 0.985998 | 0.970590 | 0.993389 | 0.633859 | 0.298946 | 0.875440 | 0.642592 | 0.628759  | 0.656191  |
| PCT 72h | 11.30 | 0.364130 | 0.042330 | 0.010325 | 0.157724 | 0.975326 | 0.952526 | 0.987322 | 0.495569 | 0.198646 | 0.795651 | 0.640089 | .62616845 | .65377759 |
| PCT     | 11.30 | 0.364130 | 0.042330 | 0.010325 | 0.157724 | 0.986137 | 0.970542 | 0.993532 | 0.636179 | 0.300931 | 0.876588 | 0.642624 | 0.628793  | 0.656223  |
| PCT 72h | 11.40 | 0.364130 | 0.042330 | 0.010325 | 0.157724 | 0.975326 | 0.952526 | 0.987322 | 0.495569 | 0.198646 | 0.795651 | 0.640089 | .62616845 | .65377759 |
| PCT     | 11.40 | 0.364130 | 0.042330 | 0.010325 | 0.157724 | 0.986137 | 0.970542 | 0.993532 | 0.636179 | 0.300931 | 0.876588 | 0.642624 | 0.628793  | 0.656223  |
| PCT 72h | 11.50 | 0.364130 | 0.042330 | 0.010325 | 0.157724 | 0.975326 | 0.952526 | 0.987322 | 0.495569 | 0.198646 | 0.795651 | 0.640089 | .62616845 | .65377759 |

|         |       |          |          |          |          |          |          |          |          |          |          |          |           |           |
|---------|-------|----------|----------|----------|----------|----------|----------|----------|----------|----------|----------|----------|-----------|-----------|
| PCT     | 11.50 | 0.364130 | 0.042330 | 0.010325 | 0.157724 | 0.986137 | 0.970542 | 0.993532 | 0.636179 | 0.300931 | 0.876588 | 0.642624 | 0.628793  | 0.656223  |
| PCT 72h | 11.60 | 0.364130 | 0.042330 | 0.010325 | 0.157724 | 0.975326 | 0.952526 | 0.987322 | 0.495569 | 0.198646 | 0.795651 | 0.640089 | .62616845 | .65377759 |
| PCT     | 11.60 | 0.364130 | 0.042330 | 0.010325 | 0.157724 | 0.986137 | 0.970542 | 0.993532 | 0.636179 | 0.300931 | 0.876588 | 0.642624 | 0.628793  | 0.656223  |
| PCT 72h | 11.70 | 0.364130 | 0.042330 | 0.010325 | 0.157724 | 0.975326 | 0.952526 | 0.987322 | 0.495569 | 0.198646 | 0.795651 | 0.640089 | .62616845 | .65377759 |
| PCT     | 11.70 | 0.364130 | 0.042330 | 0.010325 | 0.157724 | 0.986137 | 0.970542 | 0.993532 | 0.636179 | 0.300931 | 0.876588 | 0.642624 | 0.628793  | 0.656223  |
| PCT 72h | 11.80 | 0.364130 | 0.042330 | 0.010325 | 0.157724 | 0.975326 | 0.952526 | 0.987322 | 0.495569 | 0.198646 | 0.795651 | 0.640089 | .62616845 | .65377759 |
| PCT     | 11.80 | 0.364130 | 0.042330 | 0.010325 | 0.157724 | 0.986137 | 0.970542 | 0.993532 | 0.636179 | 0.300931 | 0.876588 | 0.642624 | 0.628793  | 0.656223  |
| PCT 72h | 11.90 | 0.364130 | 0.042330 | 0.010325 | 0.157724 | 0.975326 | 0.952526 | 0.987322 | 0.495569 | 0.198646 | 0.795651 | 0.640089 | .62616845 | .65377759 |
| PCT     | 11.90 | 0.364130 | 0.042330 | 0.010325 | 0.157724 | 0.986137 | 0.970542 | 0.993532 | 0.636179 | 0.300931 | 0.876588 | 0.642624 | 0.628793  | 0.656223  |
| PCT 72h | 12.00 | 0.364130 | 0.042330 | 0.010325 | 0.157724 | 0.975326 | 0.952526 | 0.987322 | 0.495569 | 0.198646 | 0.795651 | 0.640089 | .62616845 | .65377759 |
| PCT     | 12.00 | 0.364130 | 0.042330 | 0.010325 | 0.157724 | 0.986137 | 0.970542 | 0.993532 | 0.636179 | 0.300931 | 0.876588 | 0.642624 | 0.628793  | 0.656223  |
| PCT 72h | 12.10 | 0.364130 | 0.042330 | 0.010325 | 0.157724 | 0.975326 | 0.952526 | 0.987322 | 0.495569 | 0.198646 | 0.795651 | 0.640089 | .62616845 | .65377759 |
| PCT     | 12.10 | 0.364130 | 0.042330 | 0.010325 | 0.157724 | 0.986137 | 0.970542 | 0.993532 | 0.636179 | 0.300931 | 0.876588 | 0.642624 | 0.628793  | 0.656223  |
| PCT 72h | 12.20 | 0.364130 | 0.042330 | 0.010325 | 0.157724 | 0.975326 | 0.952526 | 0.987322 | 0.495569 | 0.198646 | 0.795651 | 0.640089 | .62616845 | .65377759 |
| PCT     | 12.20 | 0.364130 | 0.042330 | 0.010325 | 0.157724 | 0.986137 | 0.970542 | 0.993532 | 0.636179 | 0.300931 | 0.876588 | 0.642624 | 0.628793  | 0.656223  |
| PCT 72h | 12.30 | 0.364130 | 0.042330 | 0.010325 | 0.157724 | 0.975326 | 0.952526 | 0.987322 | 0.495569 | 0.198646 | 0.795651 | 0.640089 | .62616845 | .65377759 |
| PCT     | 12.30 | 0.364130 | 0.042330 | 0.010325 | 0.157724 | 0.986137 | 0.970542 | 0.993532 | 0.636179 | 0.300931 | 0.876588 | 0.642624 | 0.628793  | 0.656223  |
| PCT 72h | 12.40 | 0.364130 | 0.042330 | 0.010325 | 0.157724 | 0.975326 | 0.952526 | 0.987322 | 0.495569 | 0.198646 | 0.795651 | 0.640089 | .62616845 | .65377759 |
| PCT     | 12.40 | 0.364130 | 0.042330 | 0.010325 | 0.157724 | 0.986137 | 0.970542 | 0.993532 | 0.636179 | 0.300931 | 0.876588 | 0.642624 | 0.628793  | 0.656223  |
| PCT 72h | 12.50 | 0.364130 | 0.042330 | 0.010325 | 0.157724 | 0.977338 | 0.954613 | 0.988818 | 0.516821 | 0.212057 | 0.809566 | 0.640563 | .62665949 | .65423514 |
| PCT     | 12.50 | 0.364130 | 0.042330 | 0.010325 | 0.157724 | 0.987144 | 0.971339 | 0.994285 | 0.653441 | 0.316080 | 0.884958 | 0.642859 | 0.629035  | 0.656449  |
| PCT 72h | 12.60 | 0.364130 | 0.042330 | 0.010325 | 0.157724 | 0.977338 | 0.954613 | 0.988818 | 0.516821 | 0.212057 | 0.809566 | 0.640563 | .62665949 | .65423514 |
| PCT     | 12.60 | 0.364130 | 0.042330 | 0.010325 | 0.157724 | 0.987144 | 0.971339 | 0.994285 | 0.653441 | 0.316080 | 0.884958 | 0.642859 | 0.629035  | 0.656449  |
| PCT 72h | 12.70 | 0.364130 | 0.042330 | 0.010325 | 0.157724 | 0.977338 | 0.954613 | 0.988818 | 0.516821 | 0.212057 | 0.809566 | 0.640563 | .62665949 | .65423514 |
| PCT     | 12.70 | 0.364130 | 0.042330 | 0.010325 | 0.157724 | 0.987144 | 0.971339 | 0.994285 | 0.653441 | 0.316080 | 0.884958 | 0.642859 | 0.629035  | 0.656449  |
| PCT 72h | 12.80 | 0.364130 | 0.042330 | 0.010325 | 0.157724 | 0.977338 | 0.954613 | 0.988818 | 0.516821 | 0.212057 | 0.809566 | 0.640563 | .62665949 | .65423514 |
| PCT     | 12.80 | 0.364130 | 0.042330 | 0.010325 | 0.157724 | 0.987144 | 0.971339 | 0.994285 | 0.653441 | 0.316080 | 0.884958 | 0.642859 | 0.629035  | 0.656449  |
| PCT 72h | 12.90 | 0.364130 | 0.042330 | 0.010325 | 0.157724 | 0.977338 | 0.954613 | 0.988818 | 0.516821 | 0.212057 | 0.809566 | 0.640563 | .62665949 | .65423514 |
| PCT     | 12.90 | 0.364130 | 0.042330 | 0.010325 | 0.157724 | 0.987144 | 0.971339 | 0.994285 | 0.653441 | 0.316080 | 0.884958 | 0.642859 | 0.629035  | 0.656449  |
| PCT 72h | 13.00 | 0.364130 | 0.042330 | 0.010325 | 0.157724 | 0.977867 | 0.954940 | 0.989260 | 0.522721 | 0.215893 | 0.813309 | 0.640688 | .6267885  | .65435535 |
| PCT     | 13.00 | 0.364130 | 0.042330 | 0.010325 | 0.157724 | 0.987144 | 0.971339 | 0.994285 | 0.653441 | 0.316080 | 0.884958 | 0.642859 | 0.629035  | 0.656449  |
| PCT 72h | 13.10 | 0.364130 | 0.042330 | 0.010325 | 0.157724 | 0.978182 | 0.955721 | 0.989376 | 0.526293 | 0.218240 | 0.815551 | 0.640762 | .62686518 | .65442679 |
| PCT     | 13.10 | 0.364130 | 0.042330 | 0.010325 | 0.157724 | 0.987849 | 0.973368 | 0.994501 | 0.666099 | 0.327630 | 0.890914 | 0.643023 | 0.629205  | 0.656607  |
| PCT 72h | 13.20 | 0.364130 | 0.042330 | 0.010325 | 0.157724 | 0.978182 | 0.955721 | 0.989376 | 0.526293 | 0.218240 | 0.815551 | 0.640762 | .62686518 | .65442679 |
| PCT     | 13.20 | 0.364130 | 0.042330 | 0.010325 | 0.157724 | 0.987849 | 0.973368 | 0.994501 | 0.666099 | 0.327630 | 0.890914 | 0.643023 | 0.629205  | 0.656607  |
| PCT 72h | 13.30 | 0.364130 | 0.042330 | 0.010325 | 0.157724 | 0.978182 | 0.955721 | 0.989376 | 0.526293 | 0.218240 | 0.815551 | 0.640762 | .62686518 | .65442679 |
| PCT     | 13.30 | 0.364130 | 0.042330 | 0.010325 | 0.157724 | 0.987849 | 0.973368 | 0.994501 | 0.666099 | 0.327630 | 0.890914 | 0.643023 | 0.629205  | 0.656607  |
| PCT 72h | 13.40 | 0.364130 | 0.042330 | 0.010325 | 0.157724 | 0.978182 | 0.955721 | 0.989376 | 0.526293 | 0.218240 | 0.815551 | 0.640762 | .62686518 | .65442679 |
| PCT     | 13.40 | 0.364130 | 0.042330 | 0.010325 | 0.157724 | 0.987849 | 0.973368 | 0.994501 | 0.666099 | 0.327630 | 0.890914 | 0.643023 | 0.629205  | 0.656607  |
| PCT 72h | 13.50 | 0.364130 | 0.042330 | 0.010325 | 0.157724 | 0.978182 | 0.955721 | 0.989376 | 0.526293 | 0.218240 | 0.815551 | 0.640762 | .62686518 | .65442679 |
| PCT     | 13.50 | 0.364130 | 0.042330 | 0.010325 | 0.157724 | 0.987849 | 0.973368 | 0.994501 | 0.666099 | 0.327630 | 0.890914 | 0.643023 | 0.629205  | 0.656607  |
| PCT 72h | 13.60 | 0.364130 | 0.042330 | 0.010325 | 0.157724 | 0.978182 | 0.955721 | 0.989376 | 0.526293 | 0.218240 | 0.815551 | 0.640762 | .62686518 | .65442679 |
| PCT     | 13.60 | 0.364130 | 0.042330 | 0.010325 | 0.157724 | 0.987849 | 0.973368 | 0.994501 | 0.666099 | 0.327630 | 0.890914 | 0.643023 | 0.629205  | 0.656607  |
| PCT 72h | 13.70 | 0.364130 | 0.042330 | 0.010325 | 0.157724 | 0.978517 | 0.956336 | 0.989553 | 0.530145 | 0.220793 | 0.817948 | 0.640841 | .62694666 | .65450271 |
| PCT     | 13.70 | 0.364130 | 0.042330 | 0.010325 | 0.157724 | 0.988306 | 0.974377 | 0.994704 | 0.674571 | 0.335581 | 0.894817 | 0.643129 | 0.629315  | 0.656709  |
| PCT 72h | 13.80 | 0.364130 | 0.042330 | 0.010325 | 0.157724 | 0.978517 | 0.956336 | 0.989553 | 0.530145 | 0.220793 | 0.817948 | 0.640841 | .62694666 | .65450271 |
| PCT     | 13.80 | 0.364130 | 0.042330 | 0.010325 | 0.157724 | 0.988306 | 0.974377 | 0.994704 | 0.674571 | 0.335581 | 0.894817 | 0.643129 | 0.629315  | 0.656709  |

[illegible]

|         |       |          |          |          |          |          |          |          |          |          |          |          |           |           |
|---------|-------|----------|----------|----------|----------|----------|----------|----------|----------|----------|----------|----------|-----------|-----------|
| PCT     | 16.20 | 0.364130 | 0.020998 | 0.002857 | 0.138328 | 0.988542 | 0.974514 | 0.994890 | 0.512063 | 0.126616 | 0.883679 | 0.638112 | 0.628420  | 0.647693  |
| PCT 72h | 16.30 | 0.364130 | 0.020998 | 0.002857 | 0.138328 | 0.980035 | 0.957605 | 0.990713 | 0.375880 | 0.078269 | 0.810300 | 0.636114 | .62634649 | .64576964 |
| PCT     | 16.30 | 0.364130 | 0.020998 | 0.002857 | 0.138328 | 0.988542 | 0.974514 | 0.994890 | 0.512063 | 0.126616 | 0.883679 | 0.638112 | 0.628420  | 0.647693  |
| PCT 72h | 16.40 | 0.364130 | 0.020998 | 0.002857 | 0.138328 | 0.980035 | 0.957605 | 0.990713 | 0.375880 | 0.078269 | 0.810300 | 0.636114 | .62634649 | .64576964 |
| PCT     | 16.40 | 0.364130 | 0.020998 | 0.002857 | 0.138328 | 0.988542 | 0.974514 | 0.994890 | 0.512063 | 0.126616 | 0.883679 | 0.638112 | 0.628420  | 0.647693  |
| PCT 72h | 16.50 | 0.364130 | 0.020998 | 0.002857 | 0.138328 | 0.980035 | 0.957605 | 0.990713 | 0.375880 | 0.078269 | 0.810300 | 0.636114 | .62634649 | .64576964 |
| PCT     | 16.50 | 0.364130 | 0.020998 | 0.002857 | 0.138328 | 0.988542 | 0.974514 | 0.994890 | 0.512063 | 0.126616 | 0.883679 | 0.638112 | 0.628420  | 0.647693  |
| PCT 72h | 16.60 | 0.364130 | 0.020998 | 0.002857 | 0.138328 | 0.980035 | 0.957605 | 0.990713 | 0.375880 | 0.078269 | 0.810300 | 0.636114 | .62634649 | .64576964 |
| PCT     | 16.60 | 0.364130 | 0.020998 | 0.002857 | 0.138328 | 0.988542 | 0.974514 | 0.994890 | 0.512063 | 0.126616 | 0.883679 | 0.638112 | 0.628420  | 0.647693  |
| PCT 72h | 16.70 | 0.364130 | 0.020998 | 0.002857 | 0.138328 | 0.980035 | 0.957605 | 0.990713 | 0.375880 | 0.078269 | 0.810300 | 0.636114 | .62634649 | .64576964 |
| PCT     | 16.70 | 0.364130 | 0.020998 | 0.002857 | 0.138328 | 0.988542 | 0.974514 | 0.994890 | 0.512063 | 0.126616 | 0.883679 | 0.638112 | 0.628420  | 0.647693  |
| PCT 72h | 16.80 | 0.364130 | 0.020998 | 0.002857 | 0.138328 | 0.980035 | 0.957605 | 0.990713 | 0.375880 | 0.078269 | 0.810300 | 0.636114 | .62634649 | .64576964 |
| PCT     | 16.80 | 0.364130 | 0.020998 | 0.002857 | 0.138328 | 0.988542 | 0.974514 | 0.994890 | 0.512063 | 0.126616 | 0.883679 | 0.638112 | 0.628420  | 0.647693  |
| PCT 72h | 16.90 | 0.364130 | 0.020998 | 0.002857 | 0.138328 | 0.980035 | 0.957605 | 0.990713 | 0.375880 | 0.078269 | 0.810300 | 0.636114 | .62634649 | .64576964 |
| PCT     | 16.90 | 0.364130 | 0.020998 | 0.002857 | 0.138328 | 0.988542 | 0.974514 | 0.994890 | 0.512063 | 0.126616 | 0.883679 | 0.638112 | 0.628420  | 0.647693  |
| PCT 72h | 17.00 | 0.364130 | 0.020998 | 0.002857 | 0.138328 | 0.980035 | 0.957605 | 0.990713 | 0.375880 | 0.078269 | 0.810300 | 0.636114 | .62634649 | .64576964 |
| PCT     | 17.00 | 0.364130 | 0.020998 | 0.002857 | 0.138328 | 0.988542 | 0.974514 | 0.994890 | 0.512063 | 0.126616 | 0.883679 | 0.638112 | 0.628420  | 0.647693  |
